# Supplementary material for: Immunological pathogenesis of Bovine E. coli infection in a model of C. elegans
Source: PubMed Central journal article supplement (PMC9764636; doi:10.1186/s12866-022-02733-5), 2022-12-20
Supplement: 12866_2022_2733_MOESM2_ESM.pdf [file 12866_2022_2733_MOESM2_ESM.pdf]

Immunological Pathogenesis of Bovine *E. coli* Infection in a Model of *C. elegans*

Hao Peng<sup>1†</sup>, Huili Bai<sup>1†</sup>, Yan Pan<sup>2†</sup>, Jun Li<sup>1\*</sup>, Zhe Pei<sup>3</sup>, Yuying Liao<sup>1</sup>, Cuilan Wu<sup>1</sup>,  
Changting Li<sup>1</sup>, Li Tao<sup>1</sup>, Shuhong Zhong<sup>1</sup>, Chunxia Ma<sup>1</sup>, Zhongwei Chen<sup>1</sup>, Xiaoning Li<sup>1</sup>,  
Yu Gong<sup>4</sup>, Leping Wang<sup>1</sup>, Fengsheng Li<sup>1</sup>

\*Correspondence:

Prof. Jun Li, Guangxi Key Laboratory of Veterinary Biotechnology, Guangxi

Veterinary Research Institute, Nanning 530001, China

Tel: 86-0771-3186349

E-mail: jlee9981@163.com

† These authors contribute equally to this paper.

<sup>1</sup>Guangxi Key Laboratory of Veterinary Biotechnology, Guangxi Veterinary Research Institute, Nanning China; <sup>2</sup>Guangxi Agricultural Vocational University, Nanning, China; <sup>3</sup>The City College of New York, New York, USA and <sup>4</sup>Animal Science and Technology Station of Guizhou, Guiyang, China.

To clone the set of virulence factors, this study synthesized all primers according to previous studies (Table S1 A, B).

Table S1 (A) Primers for *E.coli* virulence factors

| Gene name | Primer sequences (5'-3')                                                     | Length of target fragments /bp | Annealing temperature /°C |
|-----------|------------------------------------------------------------------------------|--------------------------------|---------------------------|
| irp2      | F:AAGGATTCGCTGTTACCGGA<br>R:TCGGCCAGGATGATTCGTCG                             | 301                            | 60                        |
| Fyu A     | F:ACACGGCTTATCCTCTGGC<br>R:GGCATCTTGACGATTAACGAA                             | 953                            | 58                        |
| F41       | F:GAGGGACTTTCATCTTTAG<br>R:AGTCCATTCCATTTATAGGC                              | 431                            | 58                        |
| K88       | F:GATGAAAAAGACTCTGATTGCA<br>R:GATTGCTACGTTACGCGGAGCG                         | 841                            | 54                        |
| K99       | F:CTGAAAAAAACACTGCTAGCTATT<br>R:CATATAAGTGACTAAGAAGGATGC                     | 314                            | 52.5                      |
| 987P      | F:GTTACTGCCAGTCTATGCCAAGTG<br>R:TCGGTGTACCTGCTGAACGAATAG                     | 463                            | 56                        |
| F17       | F:GGGCTGACAGAGGAGGTGGGGC<br>R:CCCGGCACAACCTTCATCACCGG                        | 411                            | 61                        |
| F18       | F:GTGAAAAGACTAGTGTTTATTTTC<br>R:CTTGTAAGTAACCGCGTAAGC                        | 510                            | 55                        |
| Stx1      | F:TTAGACTTCTCGACTGCAAAG<br>R:TGTTGTACGAAATCCCCTCTG                           | 531                            | 52                        |
| Stx2      | F:CCATGACAACGGACAGCAGTT<br>R:CCTGTCAACTGAGCAGCACTTTG                         | 779                            | 58.3                      |
| STb       | F:TGCC TATGCA TCT ACACAATC<br>R:GC AG TGAGA AATGGAC AATG                     | 283                            | TD                        |
| STa       | F:TCCCCTCTTTTAGTCAGTCAACTG<br>R:GCACAGGCAGGATTACAACAAAGT                     | 163                            | 56                        |
| LT        | F:GGCGACAGATTATACCGTGC<br>R:CGGTCTCTATATCCCTGTT                              | 450                            | 54                        |
| eae A     | F:ATTAAGTGAATTAAGGCTGAT<br>R:ATTTATTTGCAGCCCCCAT                             | 682                            | 57                        |
| hly A     | F:GCATCATCAAGCGTACGTTCC<br>R:AATGAGCCAAGCTGGTTAAGCT                          | 534                            | 60                        |
| SepA      | F:TAAAAC-CCGCCGCTGAGTA<br>R:TGCCGGTGAACAGGAGGTTT                             | 611                            | 62                        |
| escV      | F:ATTCTGGCTCTCTTCTTTATGGCTG<br>R:CGTCCCCTTTTACAACTTCATCGC                    | 544                            | 63                        |
| ent       | F:TGGGCTAAAAGAAGACACACTG<br>R:CAAGCATCCTUATTATCTCACC                         | 629                            | 63                        |
| bfpA      | F:GGAAGTCAAATTCATGGGGGTAT<br>R:GGAATCAGACGCAGACTGGTAGT                       | 326                            | 55                        |
| bfpB      | F:GACACCTCATTGCTGAAGTCG<br>R:CCAGAACACCTCCGTTATGC                            | 910                            | 63                        |
| ipaH      | F:GAAAACCCTCCTGGTCCA TCAGG<br>R:GCCGGTCAGGCACCCTCTGAGAGTAC                   | 437                            | 63                        |
| invE      | F:CGATAGATGGCGAGAACTGGCGAGA<br>TTATATCCCG<br>R:CGATCAAGAATCCCTAACAGAAGAATCAC | 766                            | 63                        |

Table S1 (B) Primers for cloning *E.coli* virulence factors

| Gene name | Primer sequences (5'-3')                                           | The length of target fragments /bp | Annealing temperature /°C |
|-----------|--------------------------------------------------------------------|------------------------------------|---------------------------|
| aggR      | F:ACGCAGAGTTGCCTGATAAAG<br>R:AATACAGAATCGTCATCAGC                  | 400                                | 63                        |
| pic       | F:AGCCGTTTCCGCAGAAGCC<br>R:AAATGTCAGTGAACCGACGATTGG                | 1111                               | 63                        |
| astA      | F:TGCCATCAACACAGTATATCCG<br>R:ACGGCTTTGTAGTCCTTCCA T               | 102                                | 63                        |
| STIa      | F:CCTCTTTTAGY CAGACARCTGAATCASTTG<br>R:CAGGCAGGATTACAACAAAGTTCACAG | 157                                | 63                        |
| STI       | F:TGTCTTTTTCACCTTTCGCTC<br>R:CGGTACAAGCAGGATTACAACAC               | 171                                | 63                        |
| uidA      | F:ATGCCAGTCCAGCGTTTTTGC<br>R:AAAGTGTGGGTCAAT AATCAGGAAGTG          | 1487                               | 63                        |
| afa/draB  | F:TAAGGAAGTGAAGGAGCGTG<br>R:CCAGTAACTGTCCGTGACA                    | 810                                | 58                        |
| iha       | F:TAGTGCGTTGGGTTATCGCTC<br>R:AAGCCAGAGTGGTTATTCGC                  | 609                                | 58                        |
| sfa/foCD  | F:GTCCTGACTCATCTGAAACTGCA<br>R:CGGAGAACTGGGTGCATCTTA               | 1242                               | 59                        |
| sitDep.a  | F:TTGAGAACGACAGCGACTTC<br>R:CTATCGAGCAGGTGAGGA                     | 1052                               | 60                        |
| sitD chr. | F:ACTCCCATACACAGGATCTG<br>R:CTGTCTGTGTCCGGAATGA                    | 554                                | 58                        |
| iucD.a    | F:ACAAAAAGTTCTATCGCTTCC<br>R:CCTGATCCAGATGATGCTC                   | 714                                | 57                        |
| neuC      | F:GGTGGTACATTCCGGGATGTC<br>R:AGGTGAAAAGCCTGGTAGTGTG                | 676                                | 57                        |
| ompA      | F:AGCTATCGCGATTGCAGTG<br>R:GGTGTGCCAGTAACCGG                       | 919                                | 57.5                      |
| sat       | F:TGCTGGCTCTGGAGGAAC<br>R:TTGAACATTCAGAGTACCGGG                    | 667                                | 57                        |
| vat       | F:TCCTGGGACATAATGGCTAG<br>R:GTGTCAGAACGGAATTGTC                    | 981                                | 58                        |
| phoA      | F:GCAAACCGGACTACGTCACC<br>R:TGAATCCTCTTCGGAGTTCCC                  | 947                                | 57                        |
| CS31A     | F:GGGCGCTCTCTGCTTCAAC<br>R:CGCCCTAATTGCTGGCGAC                     | 402                                | 56                        |
| EAST1     | F:ATGCCATCAACACAGTATATC<br>R:TCAGGTCGCGAGTGACCG                    | 117                                | 55                        |
