# Supplementary material for: Immunological pathogenesis of Bovine E. coli infection in a model of C. elegans
Source: PubMed Central journal article supplement (PMC9764636; doi:10.1186/s12866-022-02733-5), 2022-12-20
Supplement: 12866_2022_2733_MOESM3_ESM.pdf [file 12866_2022_2733_MOESM3_ESM.pdf]

Immunological Pathogenesis of Bovine *E. coli* Infection in a Model of *C. elegans*

Hao Peng<sup>1†</sup>, Huili Bai<sup>1†</sup>, Yan Pan<sup>2†</sup>, Jun Li<sup>1\*</sup>, Zhe Pei<sup>3</sup>, Yuying Liao<sup>1</sup>, Cuilan Wu<sup>1</sup>,  
Changting Li<sup>1</sup>, Li Tao<sup>1</sup>, Shuhong Zhong<sup>1</sup>, Chunxia Ma<sup>1</sup>, Zhongwei Chen<sup>1</sup>, Xiaoning Li<sup>1</sup>,  
Yu Gong<sup>4</sup>, Leping Wang<sup>1</sup>, Fengsheng Li<sup>1</sup>

\*Correspondence:

Prof. Jun Li, Guangxi Key Laboratory of Veterinary Biotechnology, Guangxi

Veterinary Research Institute, Nanning 530001, China

Tel: 86-0771-3186349

E-mail: jlee9981@163.com

† These authors contribute equally to this paper.

<sup>1</sup>Guangxi Key Laboratory of Veterinary Biotechnology, Guangxi Veterinary Research Institute, Nanning China; <sup>2</sup>Guangxi Agricultural Vocational University, Nanning, China; <sup>3</sup>The City College of New York, New York, USA and <sup>4</sup>Animal Science and Technology Station of Guizhou, Guiyang, China.

Primers used for synthesis immunity genes of *C. elegans*

Table S2 (A, B) summarized primers in this study to clone immune genes which was studied. All listed primers have been tested previously.

Table S2 (A) Primers for immune gene cloning

| Gene name | Primer sequence (5'-3') | Target fragment /bp |
|-----------|-------------------------|---------------------|
| Act-1     | F:CCCCACTCAATCCAAAGGCT  | 121                 |
|           | R:GTACGTCCGGAAGCGTAGAG  |                     |
| Dbl-1     | F:TTTTGCGGCGAACAATCGT   | 194                 |
|           | R:TTCGCTGTTGCCTGTTTGTG  |                     |
| Tir-1     | F:TTGGGTGCACAAAGAGCTGA  | 223                 |
|           | R:GGTCGGTGTCTGTTCTGTTCA |                     |
| Nsy-1     | F:AGCGGCTCGATCAACAAGAA  | 122                 |
|           | R:CCCATTCCACCGATATGCGA  |                     |
| Sek-1     | F:CACTGTTTGGCGACGATGAG  | 158                 |
|           | R:ATTCCGTCCACGTTGCTGAT  |                     |
| Pmk-1     | F:CCAAAAATGACTCGCCGTGA  | 115                 |
|           | R:CTTTTGCAGTTGGACGACGA  |                     |
| Skn-1     | F:CTGGCATCCTCTACCACCAC  | 153                 |
|           | R:TTGGTGATGATGGCCGTGTT  |                     |
| Daf-16    | F:TCGTCTCGTGTTTCTCCAGC  | 181                 |
|           | R:TAATCGGCTTCGACTCCTGC  |                     |

Table S2 (B) Primers for immune gene cloning

| Gene name | Primer sequence (5'-3') | Target fragment /bp |
|-----------|-------------------------|---------------------|
| Age-1     | F:CTCCTGAACCGACTGCCAAT  | 359                 |
|           | R:AAATGCGAGTTCGGAGAGCA  |                     |
| Lys-7     | F:GTACAGCGGTGGAGTCACTG  | 153                 |
|           | R:GCCTTGAGCACATTTCCAGC  |                     |
| Clec-60   | F:CGGTTTCAATGCGGTATGGC  | 219                 |
|           | R:TGAAGCTGTGGTTGAGGCAT  |                     |
| Clec-85   | F:CCAATGGGATGACGGAACCA  | 121                 |
|           | R:CTTCTGTCCAGCCAACGTCT  |                     |
| Abf-3     | F:AACAGATTGGGGTCAGCTCG  | 189                 |
|           | R:TGGAGACCATTATTGCCGGG  |                     |
| Abf-2     | F:CCGTTCCCTTTTCCTTGAC   | 176                 |
|           | R:GACGACCGCTTCGTTTCTTG  |                     |
| Spp-1     | F:TGGACTATGCTGTTGCCGTT  | 106                 |
|           | R:ACGCCTTGTCTGGAGAATCC  |                     |
