# Supplementary material for: Immunological pathogenesis of Bovine E. coli infection in a model of C. elegans
Source: PubMed Central journal article supplement (PMC9764636; doi:10.1186/s12866-022-02733-5), 2022-12-20
Supplement: 12866_2022_2733_MOESM6_ESM.pdf [file 12866_2022_2733_MOESM6_ESM.pdf]

Immunological Pathogenesis of Bovine *E. coli* Infection in a Model of *C. elegans*

Hao Peng<sup>1†</sup>, Huili Bai<sup>1†</sup>, Yan Pan<sup>2†</sup>, Jun Li<sup>1\*</sup>, Zhe Pei<sup>3</sup>, Yuying Liao<sup>1</sup>, Cuilan Wu<sup>1</sup>,  
Changting Li<sup>1</sup>, Li Tao<sup>1</sup>, Shuhong Zhong<sup>1</sup>, Chunxia Ma<sup>1</sup>, Zhongwei Chen<sup>1</sup>, Xiaoning Li<sup>1</sup>,  
Yu Gong<sup>4</sup>, Leping Wang<sup>1</sup>, Fengsheng Li<sup>1</sup>

\*Correspondence:

Prof. Jun Li, Guangxi Key Laboratory of Veterinary Biotechnology, Guangxi

Veterinary Research Institute, Nanning 530001, China

Tel: 86-0771-3186349

E-mail: jlee9981@163.com

† These authors contribute equally to this paper.

<sup>1</sup>Guangxi Key Laboratory of Veterinary Biotechnology, Guangxi Veterinary Research Institute, Nanning China; <sup>2</sup>Guangxi Agricultural Vocational University, Nanning, China; <sup>3</sup>The City College of New York, New York, USA and <sup>4</sup>Animal Science and Technology Station of Guizhou, Guiyang, China.

Table S4. Longest survival time and LT50 of *Caenorhabditis elegans* infected with 13 strains of bovine *Escherichia coli*

| strain          | Longest survival time of <i>Caenorhabditis elegans</i> | LT50  |
|-----------------|--------------------------------------------------------|-------|
| <i>E.coli1</i>  | 7d                                                     | 3d    |
| <i>E.coli2</i>  | 7d                                                     | 3.5d  |
| <i>E.coli3</i>  | 7d                                                     | 3d    |
| <i>E.coli4</i>  | 8d                                                     | 3.8d  |
| <i>E.coli5</i>  | 11d                                                    | 6d    |
| <i>E.coli6</i>  | 8d                                                     | 3.2d  |
| <i>E.coli7</i>  | 9d                                                     | 4.5d  |
| <i>E.coli8</i>  | 7d                                                     | 3.75d |
| <i>E.coli9</i>  | 10d                                                    | 4d    |
| <i>E.coli10</i> | 9d                                                     | 3d    |
| <i>E.coli11</i> | 10d                                                    | 4.3d  |
| <i>E.coli12</i> | 8d                                                     | 3.3d  |
| <i>E.coli13</i> | 10d                                                    | 5d    |
