# Supplementary material for: Immunological pathogenesis of Bovine E. coli infection in a model of C. elegans
Source: PubMed Central journal article supplement (PMC9764636; doi:10.1186/s12866-022-02733-5), 2022-12-20
Supplement: 12866_2022_2733_MOESM7_ESM.pdf [file 12866_2022_2733_MOESM7_ESM.pdf]

Immunological Pathogenesis of Bovine *E. coli* Infection in a Model of *C. elegans*

Hao Peng<sup>1†</sup>, Huili Bai<sup>1†</sup>, Yan Pan<sup>2†</sup>, Jun Li<sup>1\*</sup>, Zhe Pei<sup>3</sup>, Yuying Liao<sup>1</sup>, Cuilan Wu<sup>1</sup>,  
Changting Li<sup>1</sup>, Li Tao<sup>1</sup>, Shuhong Zhong<sup>1</sup>, Chunxia Ma<sup>1</sup>, Zhongwei Chen<sup>1</sup>, Xiaoning Li<sup>1</sup>,  
Yu Gong<sup>4</sup>, Leping Wang<sup>1</sup>, Fengsheng Li<sup>1</sup>

\*Correspondence:

Prof. Jun Li, Guangxi Key Laboratory of Veterinary Biotechnology, Guangxi

Veterinary Research Institute, Nanning 530001, China

Tel: 86-0771-3186349

E-mail: jlee9981@163.com

† These authors contribute equally to this paper.

<sup>1</sup>Guangxi Key Laboratory of Veterinary Biotechnology, Guangxi Veterinary Research Institute, Nanning China; <sup>2</sup>Guangxi Agricultural Vocational University, Nanning, China; <sup>3</sup>The City College of New York, New York, USA and <sup>4</sup>Animal Science and Technology Station of Guizhou, Guiyang, China.

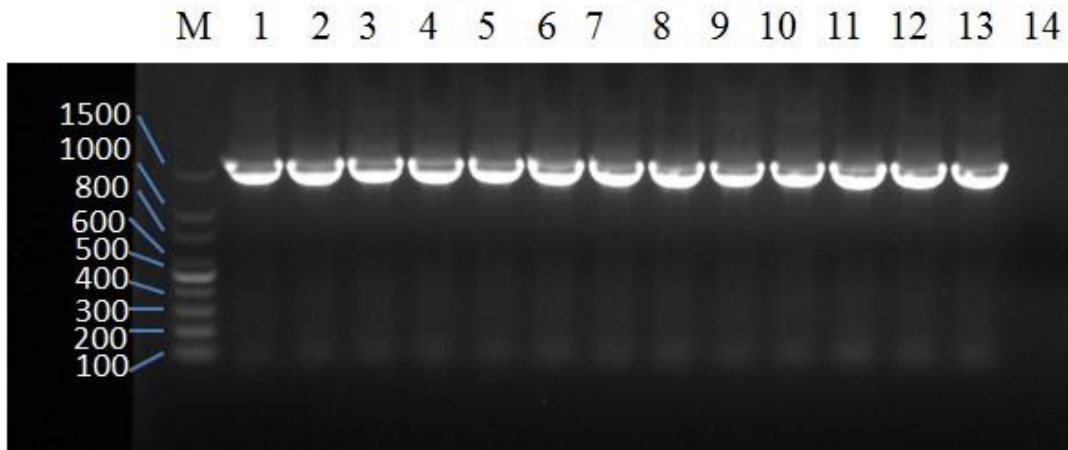

Figure S20. 16SrDNA PCR amplification results of 13 strains of bovine *Escherichia coli*. The blue lines represent the different bands of the marker (M,marker.1-13, 13 strains of bovine *Escherichia coli*.14,control.)

|            |    | Percent Identity |      |      |      |      |      |      |       |      |      |      |      |      |       |      |      |       |      |       |       |       |    |              |
|------------|----|------------------|------|------|------|------|------|------|-------|------|------|------|------|------|-------|------|------|-------|------|-------|-------|-------|----|--------------|
|            |    | 1                | 2    | 3    | 4    | 5    | 6    | 7    | 8     | 9    | 10   | 11   | 12   | 13   | 14    | 15   | 16   | 17    | 18   | 19    | 20    | 21    |    |              |
| Divergence | 1  | █                | 99.3 | 99.4 | 99.3 | 99.9 | 99.7 | 99.6 | 99.3  | 99.2 | 97.3 | 99.2 | 99.6 | 99.4 | 100.0 | 99.2 | 98.5 | 99.3  | 99.1 | 100.0 | 100.0 | 100.0 | 1  | GX11.seq     |
|            | 2  | 0.7              | █    | 99.8 | 99.9 | 99.3 | 99.0 | 99.6 | 100.0 | 99.8 | 97.7 | 99.7 | 99.3 | 99.3 | 99.3  | 99.9 | 99.1 | 99.2  | 99.6 | 99.2  | 99.2  | 99.3  | 2  | GX12.seq     |
|            | 3  | 0.6              | 0.2  | █    | 99.7 | 99.3 | 99.1 | 98.5 | 98.9  | 99.6 | 99.6 | 99.3 | 99.3 | 99.2 | 99.3  | 99.7 | 98.3 | 99.1  | 98.9 | 99.0  | 99.3  | 99.4  | 3  | GX13.seq     |
|            | 4  | 0.7              | 0.1  | 0.3  | █    | 99.3 | 97.1 | 97.0 | 97.8  | 98.9 | 96.4 | 97.8 | 99.2 | 98.8 | 99.3  | 99.8 | 98.3 | 98.8  | 98.9 | 98.9  | 99.3  | 99.3  | 4  | JF690890.seq |
|            | 5  | 0.1              | 0.7  | 0.7  | 0.7  | █    | 99.7 | 99.7 | 99.3  | 99.3 | 98.0 | 99.2 | 99.6 | 99.3 | 99.7  | 99.2 | 98.5 | 99.2  | 99.1 | 99.7  | 99.7  | 99.9  | 5  | JN129482.seq |
|            | 6  | 0.3              | 1.0  | 0.9  | 3.0  | 0.3  | █    | 99.0 | 98.5  | 96.6 | 93.1 | 99.0 | 99.2 | 98.6 | 99.7  | 98.6 | 97.4 | 98.6  | 98.6 | 99.6  | 99.7  | 99.7  | 6  | JX136950.seq |
|            | 7  | 0.4              | 0.4  | 1.5  | 3.0  | 0.3  | 1.0  | █    | 99.2  | 98.7 | 95.3 | 97.1 | 99.0 | 99.3 | 99.4  | 99.3 | 98.6 | 99.3  | 99.2 | 99.3  | 99.4  | 99.6  | 7  | KF963260.seq |
|            | 8  | 0.7              | 0.0  | 1.1  | 2.3  | 0.7  | 1.6  | 0.8  | █     | 99.5 | 96.0 | 97.2 | 98.7 | 99.2 | 99.3  | 99.6 | 98.8 | 99.2  | 99.4 | 99.1  | 99.2  | 99.3  | 8  | KT152814.seq |
|            | 9  | 0.8              | 0.2  | 0.4  | 1.2  | 0.7  | 3.5  | 1.4  | 0.5   | █    | 96.5 | 98.7 | 99.3 | 99.1 | 99.1  | 99.6 | 98.9 | 99.2  | 99.5 | 99.1  | 99.1  | 99.2  | 9  | MH158272.seq |
|            | 10 | 2.8              | 2.4  | 0.4  | 3.7  | 2.0  | 7.2  | 4.8  | 4.1   | 3.6  | █    | 95.7 | 99.0 | 96.5 | 97.4  | 97.3 | 95.8 | 96.3  | 96.4 | 96.8  | 97.2  | 97.3  | 10 | FJ997270.seq |
|            | 11 | 0.8              | 0.3  | 0.7  | 2.2  | 0.8  | 1.0  | 3.0  | 2.9   | 1.4  | 4.4  | █    | 98.9 | 99.1 | 99.1  | 99.4 | 98.2 | 99.1  | 98.7 | 98.8  | 99.2  | 99.2  | 11 | GQ157251.seq |
|            | 12 | 0.4              | 0.7  | 0.7  | 0.8  | 0.4  | 0.8  | 1.0  | 1.3   | 0.7  | 1.0  | 1.1  | █    | 99.3 | 99.5  | 99.4 | 98.3 | 99.4  | 98.8 | 99.1  | 99.5  | 99.6  | 12 | GX01.seq     |
|            | 13 | 0.6              | 0.7  | 0.8  | 1.2  | 0.7  | 1.4  | 0.7  | 0.8   | 0.9  | 3.6  | 0.9  | 0.7  | █    | 99.4  | 98.9 | 98.3 | 100.0 | 98.8 | 99.3  | 99.4  | 99.4  | 13 | GX02.seq     |
|            | 14 | 0.0              | 0.7  | 0.7  | 0.7  | 0.3  | 0.3  | 0.6  | 0.7   | 0.9  | 2.7  | 0.9  | 0.5  | 0.6  | █     | 99.2 | 98.4 | 99.3  | 99.0 | 99.9  | 99.9  | 100.0 | 14 | GX03.seq     |
|            | 15 | 0.8              | 0.1  | 0.3  | 0.2  | 0.8  | 1.4  | 0.7  | 0.4   | 0.4  | 2.7  | 0.7  | 0.6  | 1.1  | 0.8   | █    | 99.2 | 98.9  | 99.8 | 99.1  | 99.1  | 99.2  | 15 | GX04.seq     |
|            | 16 | 1.5              | 0.9  | 1.7  | 1.7  | 1.5  | 2.6  | 1.4  | 1.2   | 1.1  | 4.3  | 1.9  | 1.8  | 1.8  | 1.6   | 0.8  | █    | 98.2  | 99.4 | 98.6  | 98.6  | 98.5  | 16 | GX05.seq     |
|            | 17 | 0.7              | 0.8  | 0.9  | 1.2  | 0.8  | 1.4  | 0.7  | 0.8   | 0.8  | 3.8  | 0.9  | 0.6  | 0.0  | 0.7   | 1.1  | 1.8  | █     | 98.8 | 99.3  | 99.3  | 99.3  | 17 | GX06.seq     |
|            | 18 | 0.9              | 0.4  | 1.1  | 1.1  | 0.9  | 1.4  | 0.8  | 0.6   | 0.5  | 3.7  | 1.3  | 1.2  | 1.2  | 1.0   | 0.2  | 0.6  | 1.2   | █    | 99.1  | 99.1  | 99.1  | 18 | GX07.seq     |
|            | 19 | 0.0              | 0.8  | 1.0  | 1.1  | 0.3  | 0.4  | 0.7  | 0.9   | 0.9  | 3.3  | 1.2  | 0.9  | 0.7  | 0.1   | 0.9  | 1.4  | 0.7   | 0.9  | █     | 100.0 | 100.0 | 19 | GX08.seq     |
|            | 20 | 0.0              | 0.8  | 0.7  | 0.7  | 0.3  | 0.3  | 0.6  | 0.8   | 0.9  | 2.9  | 0.8  | 0.5  | 0.6  | 0.1   | 0.9  | 1.5  | 0.7   | 0.9  | 0.0   | █     | 100.0 | 20 | GX09.seq     |
|            | 21 | 0.0              | 0.7  | 0.6  | 0.7  | 0.1  | 0.3  | 0.4  | 0.7   | 0.8  | 2.8  | 0.8  | 0.4  | 0.6  | 0.0   | 0.8  | 1.5  | 0.7   | 0.9  | 0.0   | 0.0   | █     | 21 | GX10.seq     |
|            | 1  | 2                | 3    | 4    | 5    | 6    | 7    | 8    | 9     | 10   | 11   | 12   | 13   | 14   | 15    | 16   | 17   | 18    | 19   | 20    | 21    |       |    |              |

Figure S21. 16S rDNA Molecular Biological Identification Results of *Escherichia coli*. JF690890,JN129482,JX136950,KF963260,KT152814,MH158272,FJ997270,GQ157251 were *Escherichia coli* from different sources downloaded from NCBI as reference.
